# Supplementary material for: Centrosymmetric to non-centrosymmetric transition in the Ca2−xMnxTi2O6 double perovskite system studied through structural analysis and dielectric properties
Source: Royal Society of Chemistry journal article supplement (doi:10.1039/d4dt00360h), 2024-01-01
Supplement: d4dt00360h1.pdf [file d4dt00360h1.pdf]

**Supporting Information for "Centrosymmetric to  
non-centrosymmetric transition in the  $\text{Ca}_{2-x}\text{Mn}_x\text{Ti}_2\text{O}_6$  double  
perovskite system studied through structural analysis and  
dielectric properties"**

Elisabeth Albrecht,<sup>1</sup> Tuomo Siponkoski,<sup>2</sup> Eeva-Leena  
Rautama,<sup>1</sup> Maarit Karppinen,<sup>1</sup> and Antti J. Karttunen<sup>1,\*</sup>

*<sup>1</sup>Department of Chemistry and Materials Science,  
Aalto University, P.O. Box 16100, FI-00076 Aalto, Finland*

*<sup>2</sup>Microelectronics Research Unit, University of Oulu,  
P.O. Box 4500, FI-90014 University of Oulu (Finland)*

---

\* antti.karttunen@aalto.fi

Table I. Lattice parameters of  $\text{Ca}_{2-x}\text{Mn}_x\text{Ti}_2\text{O}_6$  for  $x = 0.2; 0.3; 0.4; 0.5; 0.6; 0.7; 0.8;$  and  $1.0$ , determined by Rietveld refinement of powder XRD data. The amount of impurity phases was found to be less than 2%. Standard deviations for the lattice parameters are given in parentheses.

| $x$ | space group | $a$ [Å]    | $b$ [Å]    | $c$ [Å]    |
|-----|-------------|------------|------------|------------|
| 0.2 | $Pbnm$      | 5.36427(3) | 5.43357(3) | 7.63254(4) |
| 0.3 | $Pbnm$      | 5.38581(2) | 5.39712(2) | 7.6232(3)  |
| 0.4 | $P4_2mc$    | 7.61263(3) |            | 7.63618(5) |
| 0.5 | $P4_2mc$    | 7.59972(3) |            | 7.64011(5) |
| 0.6 | $P4_2mc$    | 7.58661(3) |            | 7.63863(4) |
| 0.7 | $P4_2mc$    | 7.58054(5) |            | 7.63439(7) |
| 0.8 | $P4_2mc$    | 7.56404(3) |            | 7.62478(4) |
| 1.0 | $P4_2mc$    | 7.54291(3) |            | 7.60323(4) |

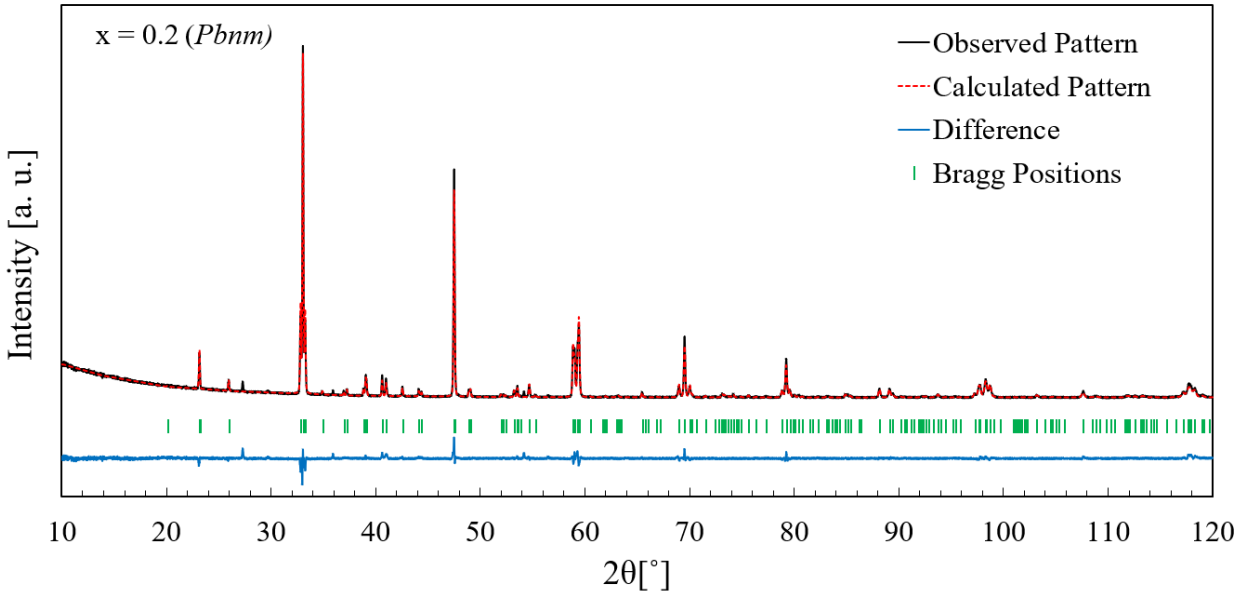

Figure 1. Rietveld refined powder X-ray diffraction pattern of  $\text{Ca}_{2-x}\text{Mn}_x\text{Ti}_2\text{O}_6$  ( $x = 0.2$ ) in space group  $Pbnm$ . Measured pattern in black, calculated pattern in red, difference curve in blue, and Bragg positions in green.  $R_p$ : 8.39;  $R_{wp}$ : 11.3;  $\chi^2$ : 4.25;  $R_{Bragg}$ : 8.97.

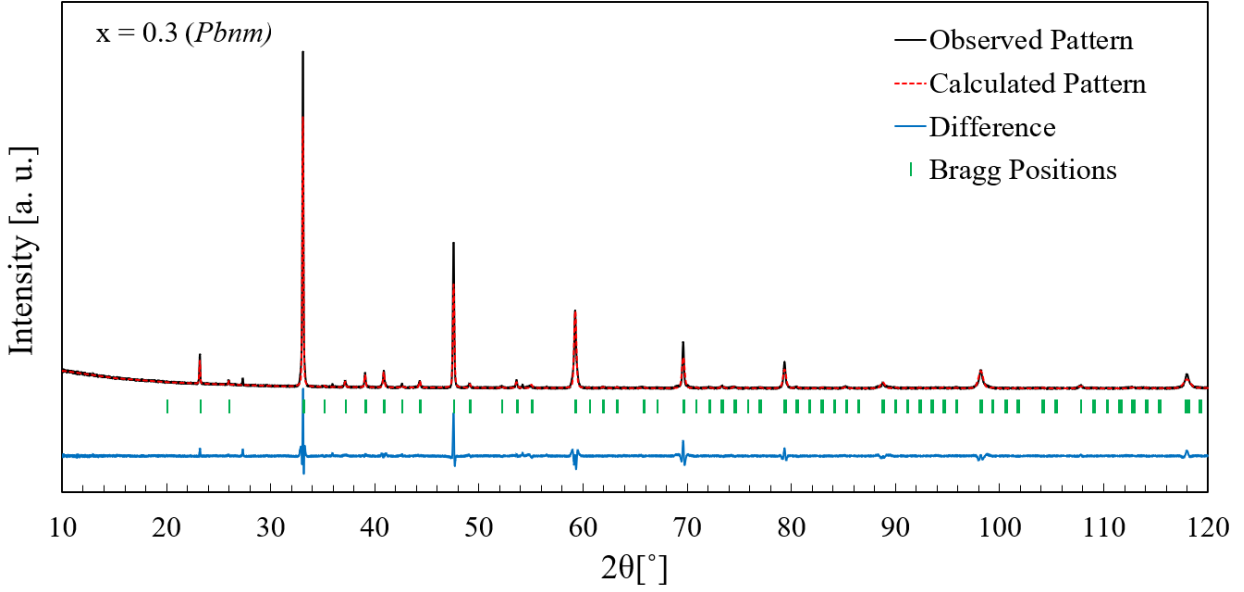

Figure 2. Rietveld refined diffraction pattern of  $\text{Ca}_{2-x}\text{Mn}_x\text{Ti}_2\text{O}_6$  with  $x = 0.3$  in space group  $Pbnm$ . Measured pattern in black, calculated pattern in red, measured minus calculated pattern in blue, and the Bragg positions in green.  $R_p$ : 16.2;  $R_{wp}$ : 21.5;  $\chi^2$ : 15.9;  $R_{Bragg}$ : 9.66.

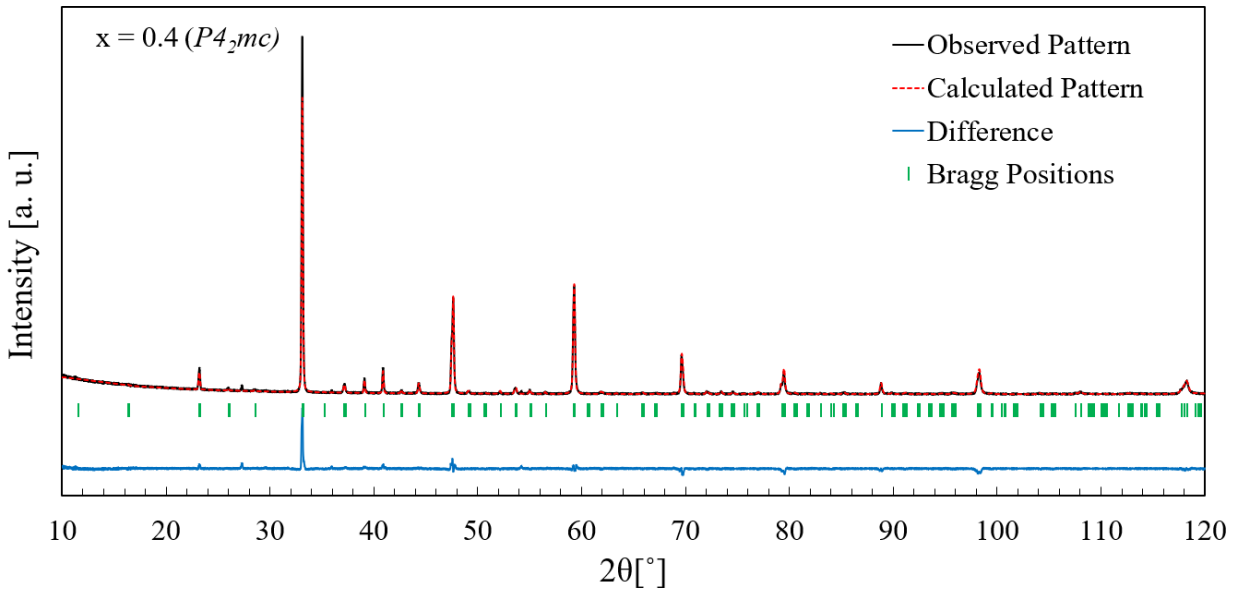

Figure 3. Rietveld refined diffraction pattern of  $\text{Ca}_{2-x}\text{Mn}_x\text{Ti}_2\text{O}_6$  with  $x = 0.4$  in space group  $P4_2mc$ . Measured pattern in black, calculated pattern in red, measured minus calculated pattern in blue, and the Bragg positions in green.  $R_p$ : 10.4;  $R_{wp}$ : 13.9;  $\chi^2$ : 9.20;  $R_{Bragg}$ : 15.2.

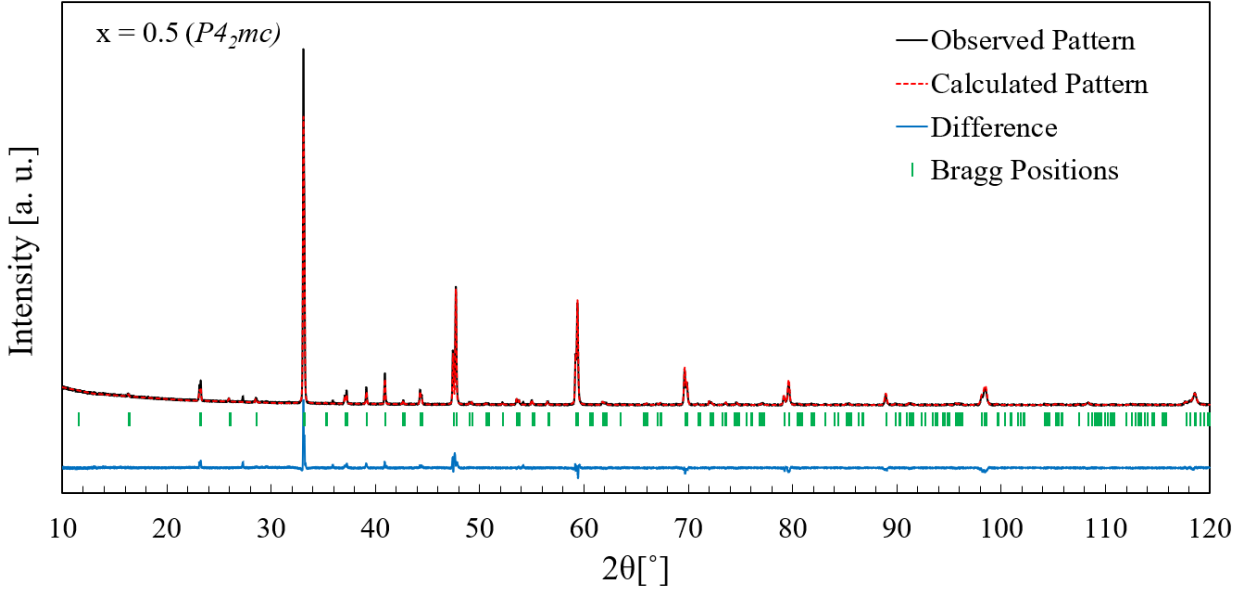

Figure 4. Rietveld refined diffraction pattern of  $\text{Ca}_{2-x}\text{Mn}_x\text{Ti}_2\text{O}_6$  with  $x = 0.5$  in space group  $P4_2mc$ . Measured pattern in black, calculated pattern in red, measured minus calculated pattern in blue, and the Bragg positions in green.  $R_p$ : 11.2;  $R_{wp}$ : 14.9;  $\chi^2$ : 11.1;  $R_{Bragg}$ : 15.5.

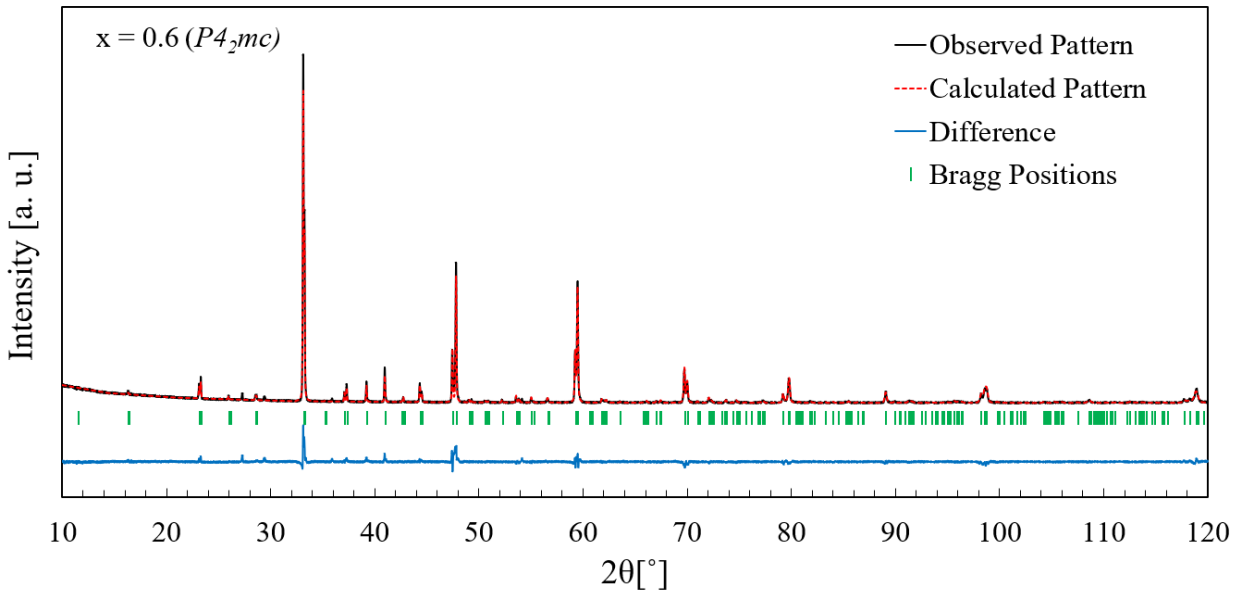

Figure 5. Rietveld refined diffraction pattern of  $\text{Ca}_{2-x}\text{Mn}_x\text{Ti}_2\text{O}_6$  with  $x = 0.6$  in space group  $P4_2mc$ . Measured pattern in black, calculated pattern in red, measured minus calculated pattern in blue, and the Bragg positions in green.  $R_p$ : 11.2;  $R_{wp}$ : 15.1;  $\chi^2$ : 10.6;  $R_{Bragg}$ : 10.0.

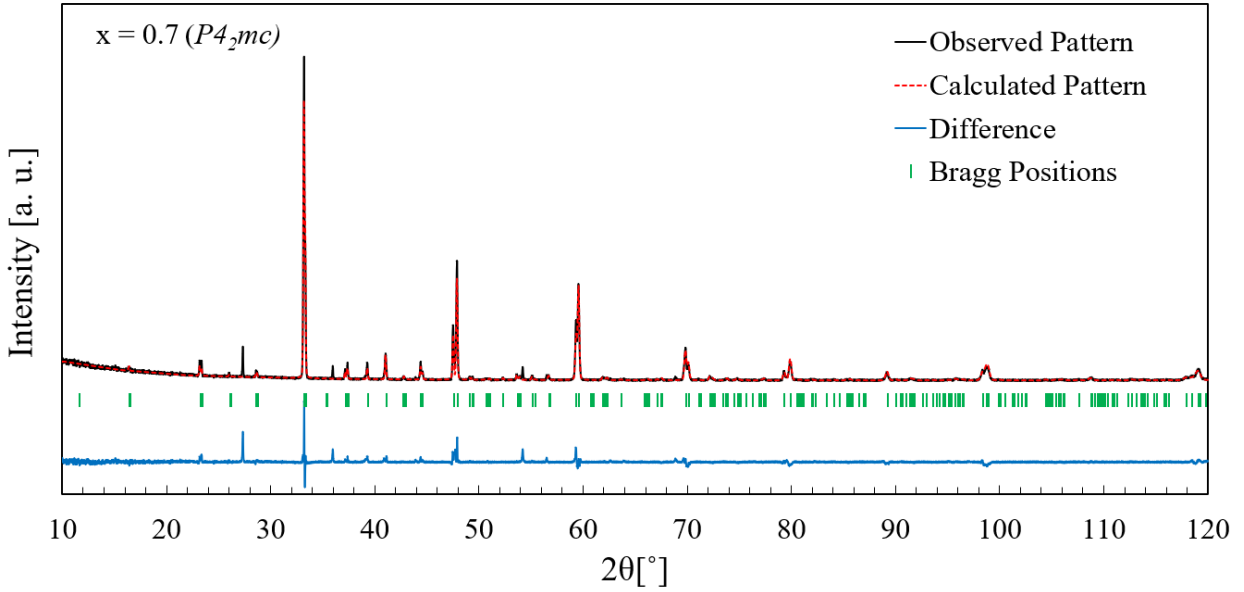

Figure 6. Rietveld refined diffraction pattern of  $\text{Ca}_{2-x}\text{Mn}_x\text{Ti}_2\text{O}_6$  with  $x = 0.7$  in space group  $P4_2mc$ . Measured pattern in black, calculated pattern in red, measured minus calculated pattern in blue, and the Bragg positions in green.  $R_p$ : 14.2;  $R_{wp}$ : 19.2;  $\chi^2$ : 3.74;  $R_{Bragg}$ : 17.1.

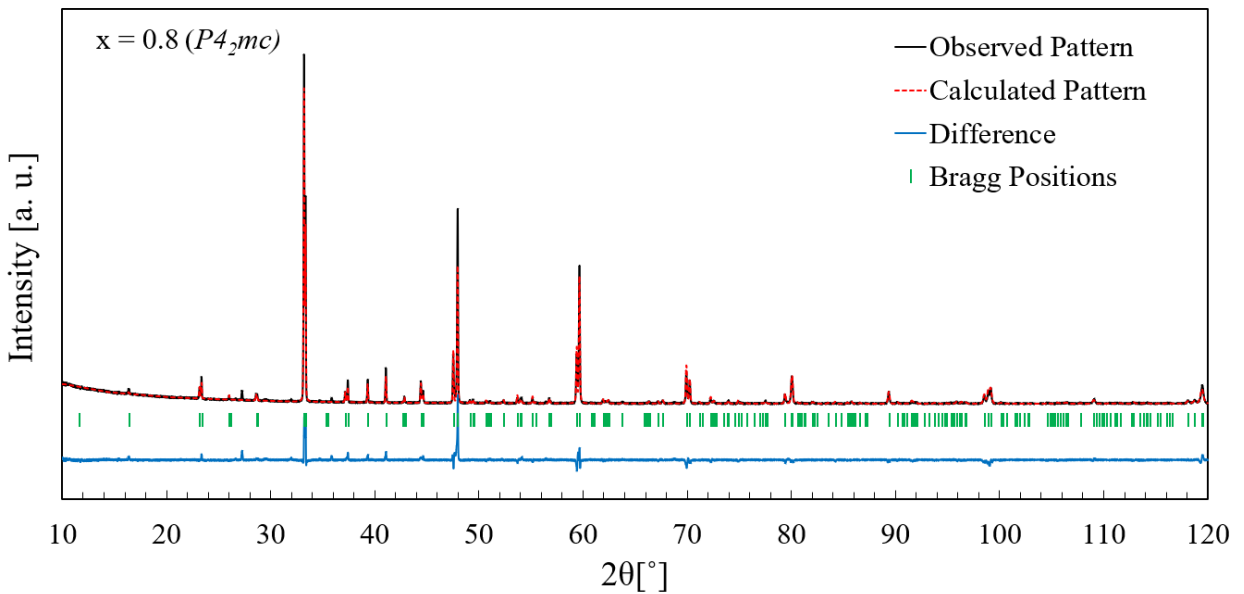

Figure 7. Rietveld refined diffraction pattern of  $\text{Ca}_{2-x}\text{Mn}_x\text{Ti}_2\text{O}_6$  with  $x = 0.8$  in space group  $P4_2mc$ . Measured pattern in black, calculated pattern in red, measured minus calculated pattern in blue, and the Bragg positions in green.  $R_p$ : 13.3;  $R_{wp}$ : 17.9;  $\chi^2$ : 13.0;  $R_{Bragg}$ : 14.7.

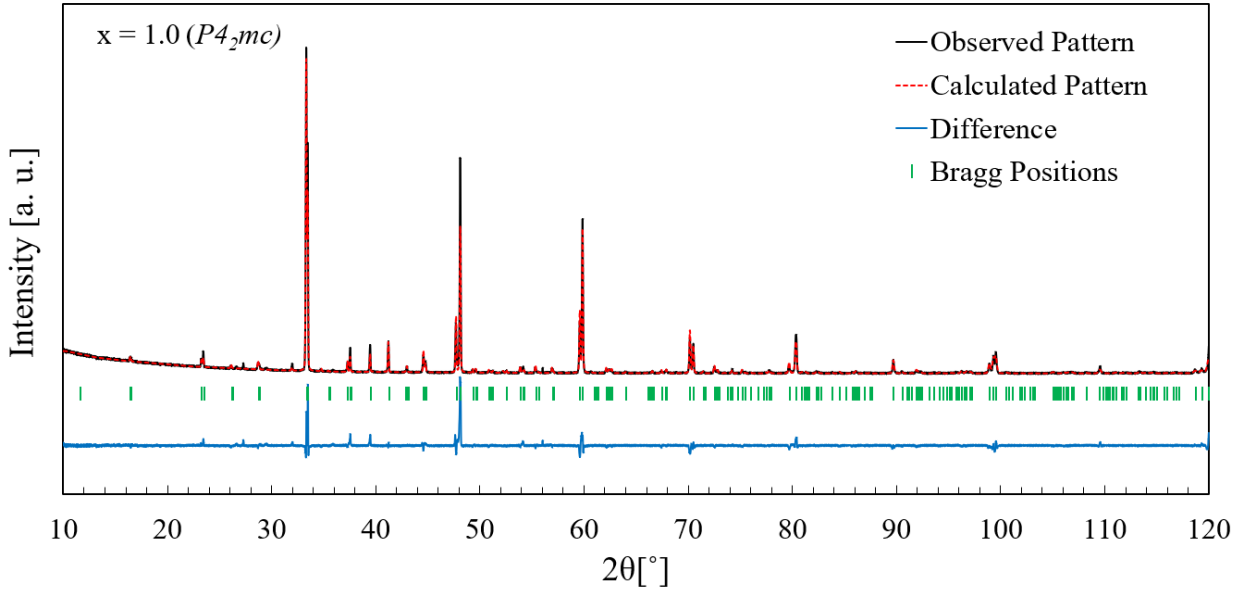

Figure 8. Rietveld refined diffraction pattern of  $\text{Ca}_{2-x}\text{Mn}_x\text{Ti}_2\text{O}_6$  with  $x = 1.0$  in space group  $P4_2mc$ . Measured pattern in black, calculated pattern in red, measured minus calculated pattern in blue, and the Bragg positions in green.  $R_p$ : 11.6;  $R_{wp}$ : 16.6;  $\chi^2$ : 12.5;  $R_{Bragg}$ : 13.9.

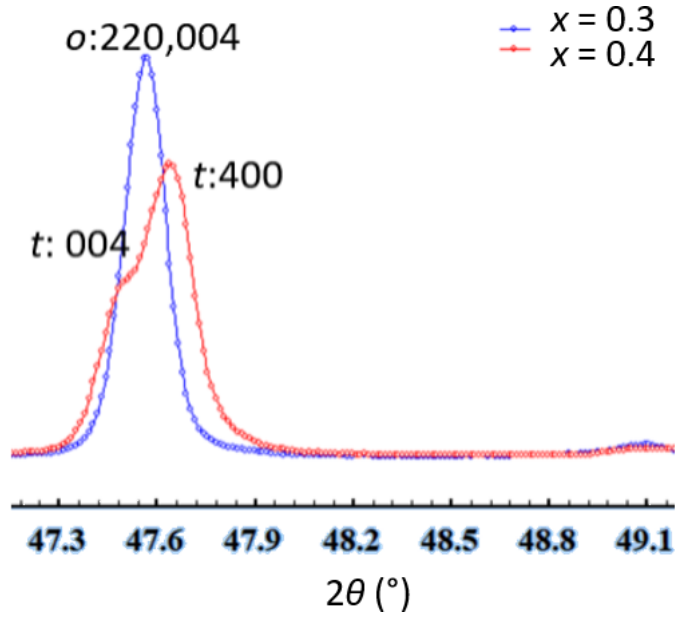

Figure 9. Diffraction pattern of  $\text{Ca}_{2-x}\text{Mn}_x\text{Ti}_2\text{O}_6$  with  $x = 0.3$  (blue) and  $x = 0.4$  (red). The peak belonging to an orthorhombic space group is marked with 'o' while the peaks belonging to a tetragonal unit cell are marked with 't'. The most general orthorhombic space group  $Pmmm$  and the space group  $Pbnm$  were used for 'o' and the most general tetragonal space group  $P4/mmm$  and the space group  $P4_2mc$  were used for 't'. While these space groups are the best fit for the peaks shown here, the peak splitting in  $x = 0.4$  alone is not sufficient evidence for a tetragonal space group. The missing peak splitting for  $x = 0.3$  arises from a fairly pseudo-cubic and highly pseudo-tetragonal unit cell.

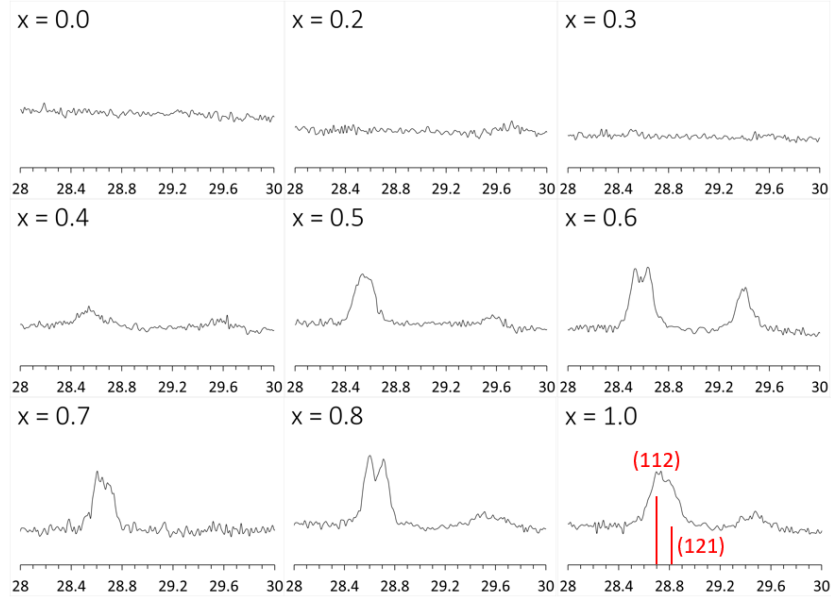

Figure 10. Changes around  $2\theta = 28.8^\circ$  in the powder diffraction pattern of  $\text{Ca}_{2-x}\text{Mn}_x\text{Ti}_2\text{O}_6$  from  $\text{CaTiO}_3$  ( $x = 0$ ) to  $\text{CaMnTi}_2\text{O}_6$  ( $x = 1$ ). The Miller indices of the peaks (112) and (121) appear only in the structure with the space group  $P4_2mc$  and are given in red.

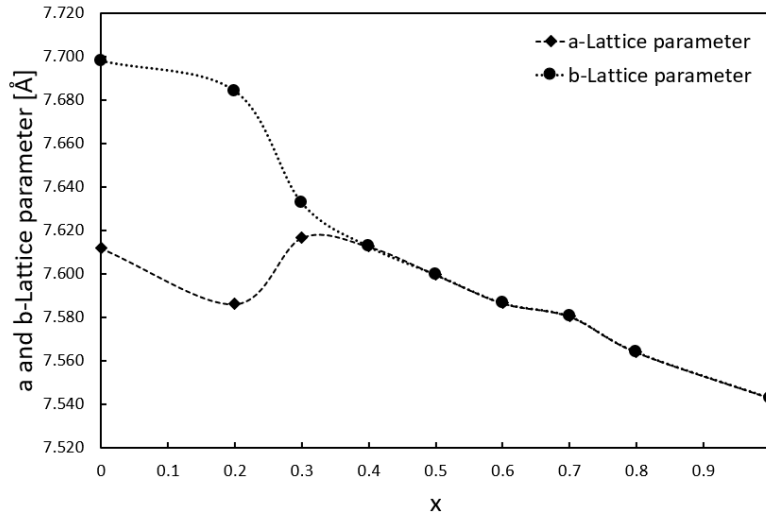

Figure 11. Relation between the lattice parameters  $a$  and  $b$  and the amount of Mn(II) substitution in  $\text{Ca}_{2-x}\text{Mn}_x\text{Ti}_2\text{O}_6$ . The lattice parameters of those samples refined in space group  $Pbnm$ ,  $x = 0.0$  to  $0.3$  were scaled by a factor of  $\sqrt{2}$ .



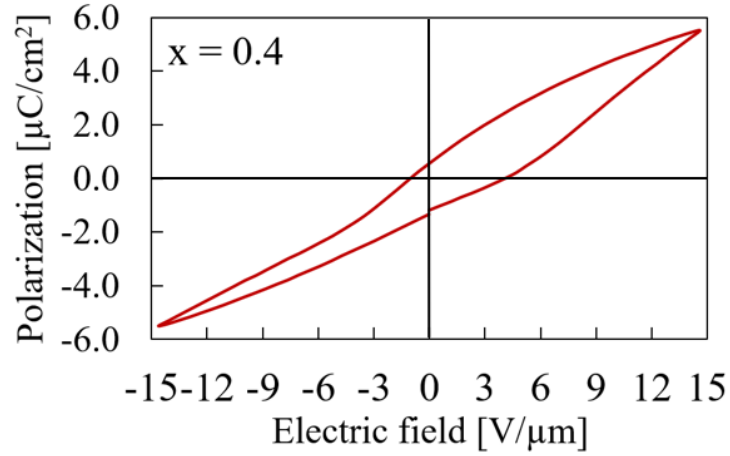

Figure 12. Polarization vs. electric field hysteresis curve of  $\text{Ca}_{2-x}\text{Mn}_x\text{Ti}_2\text{O}_6$  ( $x = 0.4$ ) obtained with a maximum electric field of  $15 \text{ V}/\mu\text{m}$  at 20 Hz.

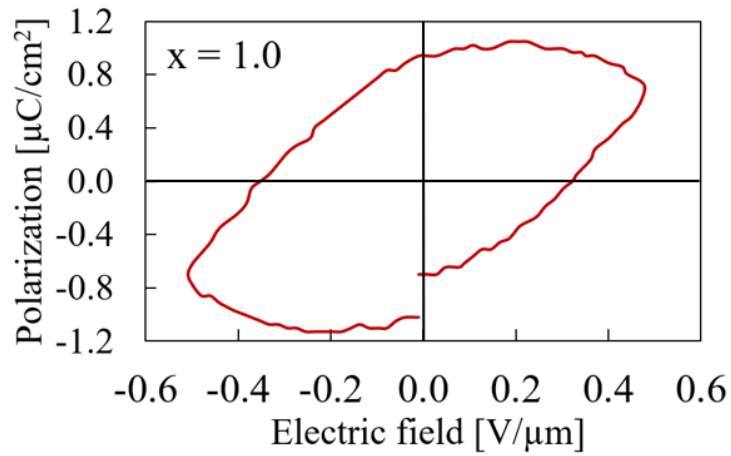

Figure 13. Polarization vs. electric field hysteresis curve of  $\text{Ca}_{2-x}\text{Mn}_x\text{Ti}_2\text{O}_6$  ( $x = 1.0$ ) obtained with a maximum electric field of  $0.5 \text{ V}/\mu\text{m}$  at 20 Hz.
